# Supplementary material for: How Little Do We Know about HIV and STIs Prevention? Results from a Web-Based Survey among the General Population
Source: MDPI journal article supplement (doi:10.3390/healthcare10061059), 2022-06-08
Supplement: s1 [file s1]

the level of awareness about HIV and STIs

- 1. How old are you? (Open question)**
- 2. Gender**
  - Male
  - Female
  - Transgender female
  - Transgender male
  - Other
- 3. Region of origin** (All the Italian regions were listed as options)
- 4. Educational level:**
  - None
  - Primary school
  - Middle school
  - Secondary school
  - University degree or higher
  - I prefer not to answer
- 5. Occupation:**
  - Unemployed
  - Retired
  - Self-employed
  - Employee
  - Temporary job
  - Student
  - Housewife
  - Health worker/health profession student
  - I prefer not to answer
- 6. What is HIV? (only one corrected answer)**
  - A virus
  - A bacterium
  - A fungi
  - I do not know
  - It does not exist
  - Other
- 7. How is it possible to transmit HIV?**
  - Through kisses
  - Through blood
  - Through sexual intercourse
  - During labour
  - I do not know
- 8. Through which of the following is HIV transmitted?**
  - Saliva
  - Blood
  - Vaginal discharge
  - Sperm
  - Sweat
  - Urine
  - I do not know
- 9. How is it possible to recognize a person living with HIV?**

It is not possible  
From skin patches  
He/She would be extremely thin  
He/She would look like an ill person  
I do not know

**10. Is it dangerous to live with a person living with HIV?**

Not at all  
Yes, by sharing services  
Yes, by drinking from the same glass  
Yes, by sharing kisses and hugs  
I do not know

**11. In your opinion, if a person living with HIV timely assumes his/her treatment and has an undetectable viral load, can He/She transmit the virus?**

(Yes or No answer)

**12. What is the age at higher risk of contracting a sexually transmitted infection? (only one corrected answer)**

15-25  
30-40  
40-50  
>50  
I do not know

**13. Does contraceptive pill protect from sexually transmitted infections? (only one corrected answer)**

No, never  
Yes, always  
It depends on the woman's age  
I do not know

**14. Which are the microorganism responsible for sexually transmitted infections?**

Viruses  
Bacteria  
Protozoa  
I do not know

**15. How is it possible to acquire sexually transmitted infections?**

Through saliva  
Through sperm  
Through vaginal discharge  
Through cough and sputum  
I do not know

**16. How is it possible to prevent sexually transmitted infections and HIV transmission?**

Using condoms during the whole and all sexual intercourses  
With proper intimate cleansing after each sexual intercourse  
By assuming contraceptive pills  
By practicing interrupted coitum  
I do not know

**17. In which kind of sexual intercourse, do you have the highest chance of HIV and sexually transmitted infection transmission?**

Receptive intercourse  
Penetrative intercourse  
Both  
There is not risk of any kind

I do not know

**18. Have you ever had sexual intercourse in your life?**

(Yes, No, I prefer not to answer)

**19. During an occasional sexual intercourse, how often do you use condoms?**

Always

Almost always

Sometimes

Never

I prefer not to answer

**20. Have you ever heard of U=U campaign? (Yes or No answer)**

**21. Do you think taking part to this survey could have been the chance to learn more about this topic? (Yes or No answer)**
